# Supplementary material for: ZAKβ is activated by cellular compression and mediates contraction‐induced MAP kinase signaling in skeletal muscle
Source: PubMed Central journal article supplement — EMBO J. 2022 Jul 28;41(17):e111650. doi: 10.15252/embj.2022111650 (PMC9434084; doi:10.15252/embj.2022111650), 2022-07-28
Supplement: EMBJ-41-e111650-s008.pdf [file EMBJ-41-e111650-s008.pdf]

## Expanded View Figures

### Figure EV1. MAP3Ks activated by osmotic shock.

- A Schematic of the haploid genetic screen workflow to map genetic regulators of p38 activation in response to osmotic shock.
- B HAP1 cells and cells deleted for ZAK ( $\Delta$ ZAK) were treated with anisomycin (1 h) or 500 mM sorbitol (1 h). Lysates were analyzed by immunoblotting with the indicated antibodies.
- C U2OS cells stably expressing S-HA-ZAK $\beta$  were treated with increasing concentrations of sorbitol (1 h). Lysates were analyzed as in (B).
- D U2OS cells were pretreated with ZAK inhibitor (ZAKi, 0.5 h) and treated with sorbitol (500 mM, 1 h). Lysates were treated with lambda phosphatase ( $\lambda$  phos.) and phosphatase inhibitor (PPI) as indicated and analyzed as in (B).
- E U2OS  $\Delta$ ZAK cells stably expressing wildtype (WT) or kinase-dead (KD) ZAK $\beta$ -GFP were treated with sorbitol (500 mM, 1 h) as indicated. Lysates were analyzed as in (B).
- F U2OS and  $\Delta$ ZAK cells were treated with sorbitol (500 mM) for the indicated time points and analyzed as in (B).
- G U2OS and  $\Delta$ ZAK cells were treated with sorbitol (500 mM), washed out for sorbitol, and allowed to recover for the indicated time points. Lysates were analyzed as in (B).
- H U2OS and  $\Delta$ ZAK cells were transfected with siRNAs and treated with sorbitol (500 mM, 1 h) as indicated. Lysates were analyzed as in (B).
- I U2OS,  $\Delta$ ZAK, and  $\Delta$ ZAK cells rescued with wildtype (WT) or ribosome-binding deficient ( $\Delta$ S $\Delta$ CTD) S-HA-ZAK $\alpha$  constructs were treated with sorbitol (500 mM, 1 h) as indicated. Lysates were analyzed as in (B).

Source data are available online for this figure.

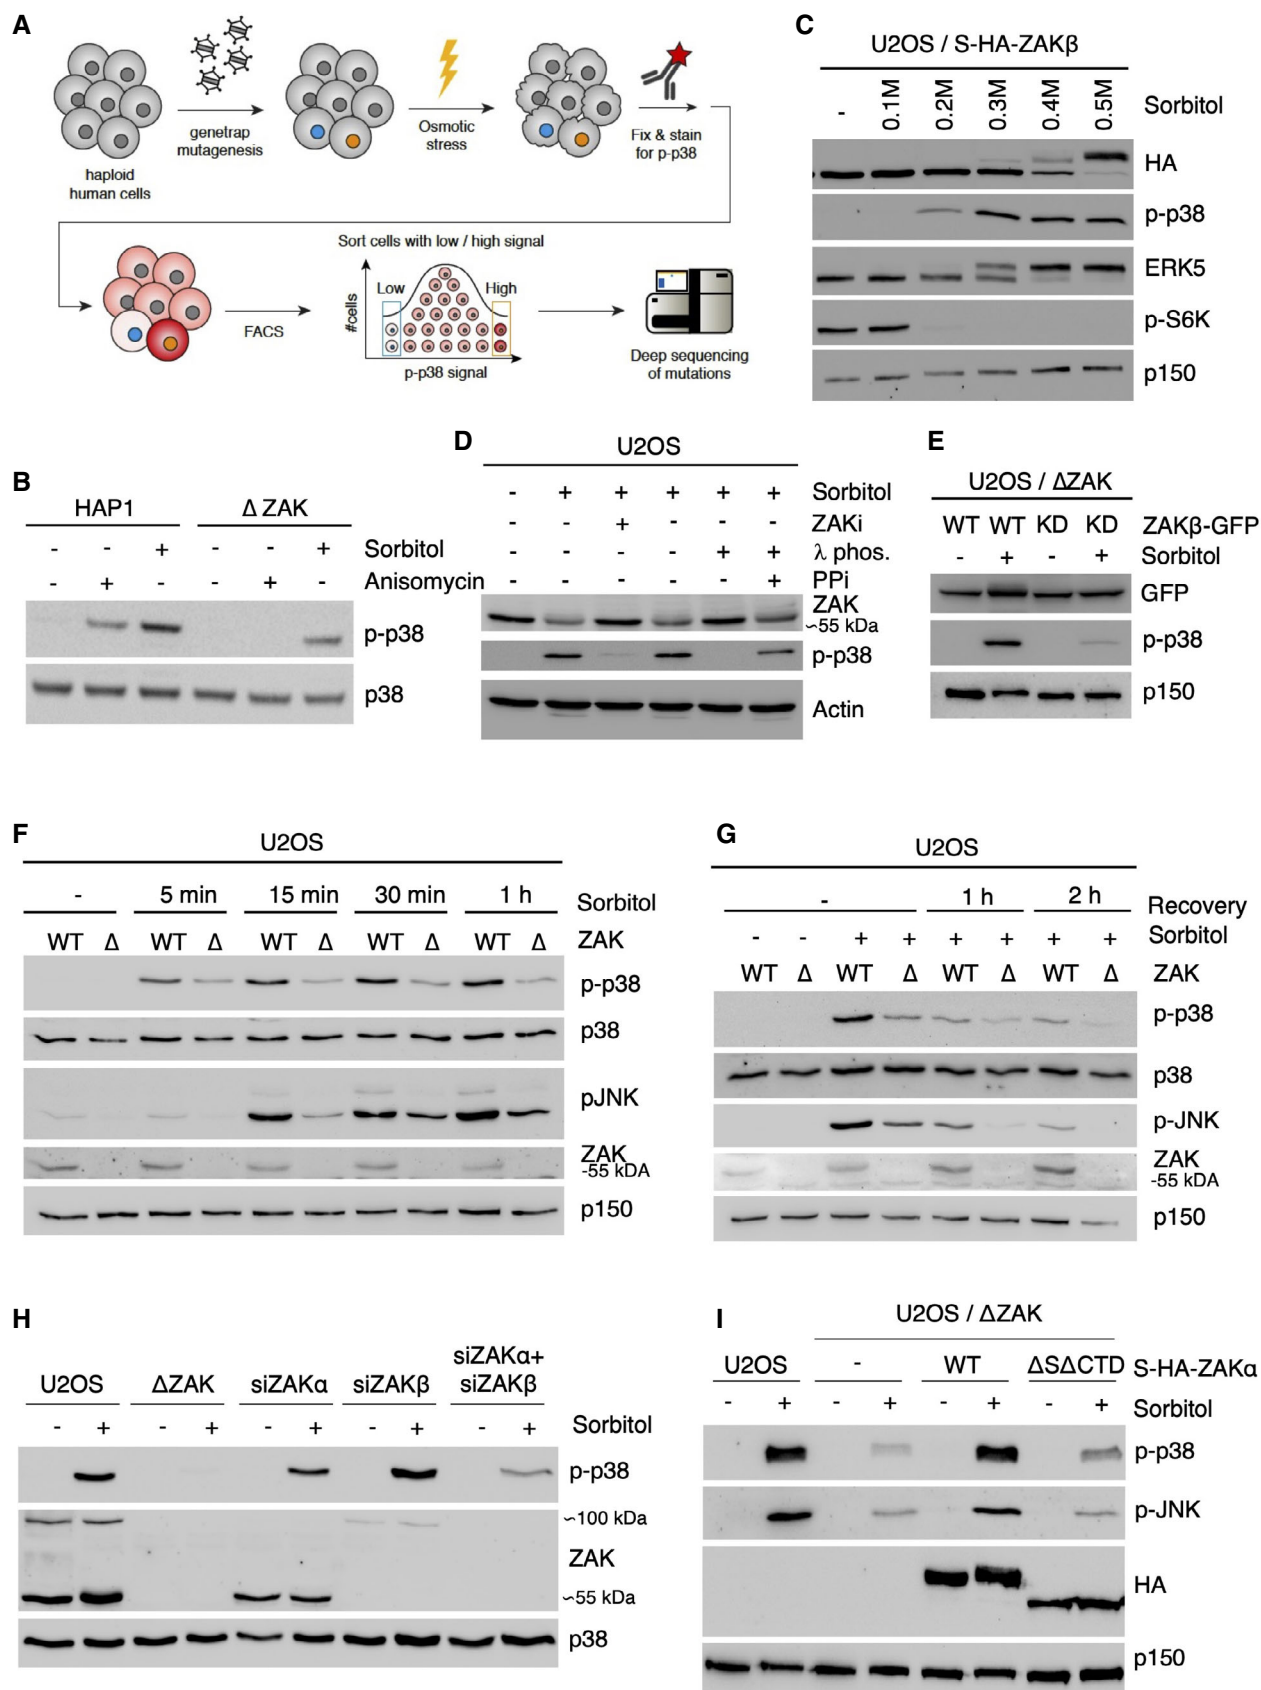

Figure EV1.

**Figure EV2. Sorbitol-induced recruitment of ZAK $\beta$  to the nuclear lamina and nuclear domains.**

- A U2OS and  $\Delta$ ZAK cells were transfected with MEKK2 siRNA and treated with sorbitol (500 mM, 1 h) as indicated. Lysates were analyzed by immunoblotting with the indicated antibodies.
- B Left: U2OS cells stably expressing ZAK $\beta$ -GFP were treated with sorbitol (500 mM, 1 h). Cells were fixed and immunostained with Lamin A/C antibody. Right: Same as left except that HeLa cells transiently expressing ZAK $\beta$ -GFP were immunostained with 53BP1 antibody. Lower panel: Intensity distribution graphs showing fluorescence intensities along the magenta lines.
- C HeLa cells transfected with ZAK $\beta$ -GFP were treated with sorbitol (500 mM, 1 h) or exposed to ionizing radiation (IR, 4 Gy – 1 h). Cells were fixed and immunostained with  $\gamma$ H2AX antibody and counterstained with DAPI.
- D As in (C) but immunostained with 53BP1 antibody.
- E Quantification of cells from (Fig 2D) with nuclear structure- and/or stress fiber-localized ZAK $\beta$ . \*\*\*\* $P < 0.0001$  in the Fisher's exact test.
- F U2OS cells stably expressing ZAK $\beta$ -GFP were imaged by live-cell fluorescence microscopy. Cells were treated with sorbitol (500 mM, 15 min) before washout. Shown is the last frame before washout, the first frame after washout, and 5 min after washout.
- G U2OS cells stably expressing GFP-ZAK $\alpha$  were imaged by live-cell fluorescence microscopy. Sorbitol (final concentration 500 mM) was added after the acquisition of the first frame.
- H U2OS cells from (F) were treated with SiR-actin for 15 min prior to sorbitol and imaged as in (G).
- I Cells from (F) were co-transfected with mCherry- $\alpha$ -actinin1 and imaged as in (G). Inserts show higher magnification of the yellow regions.

Data information: All scale bars, 10  $\mu$ m.

Source data are available online for this figure.

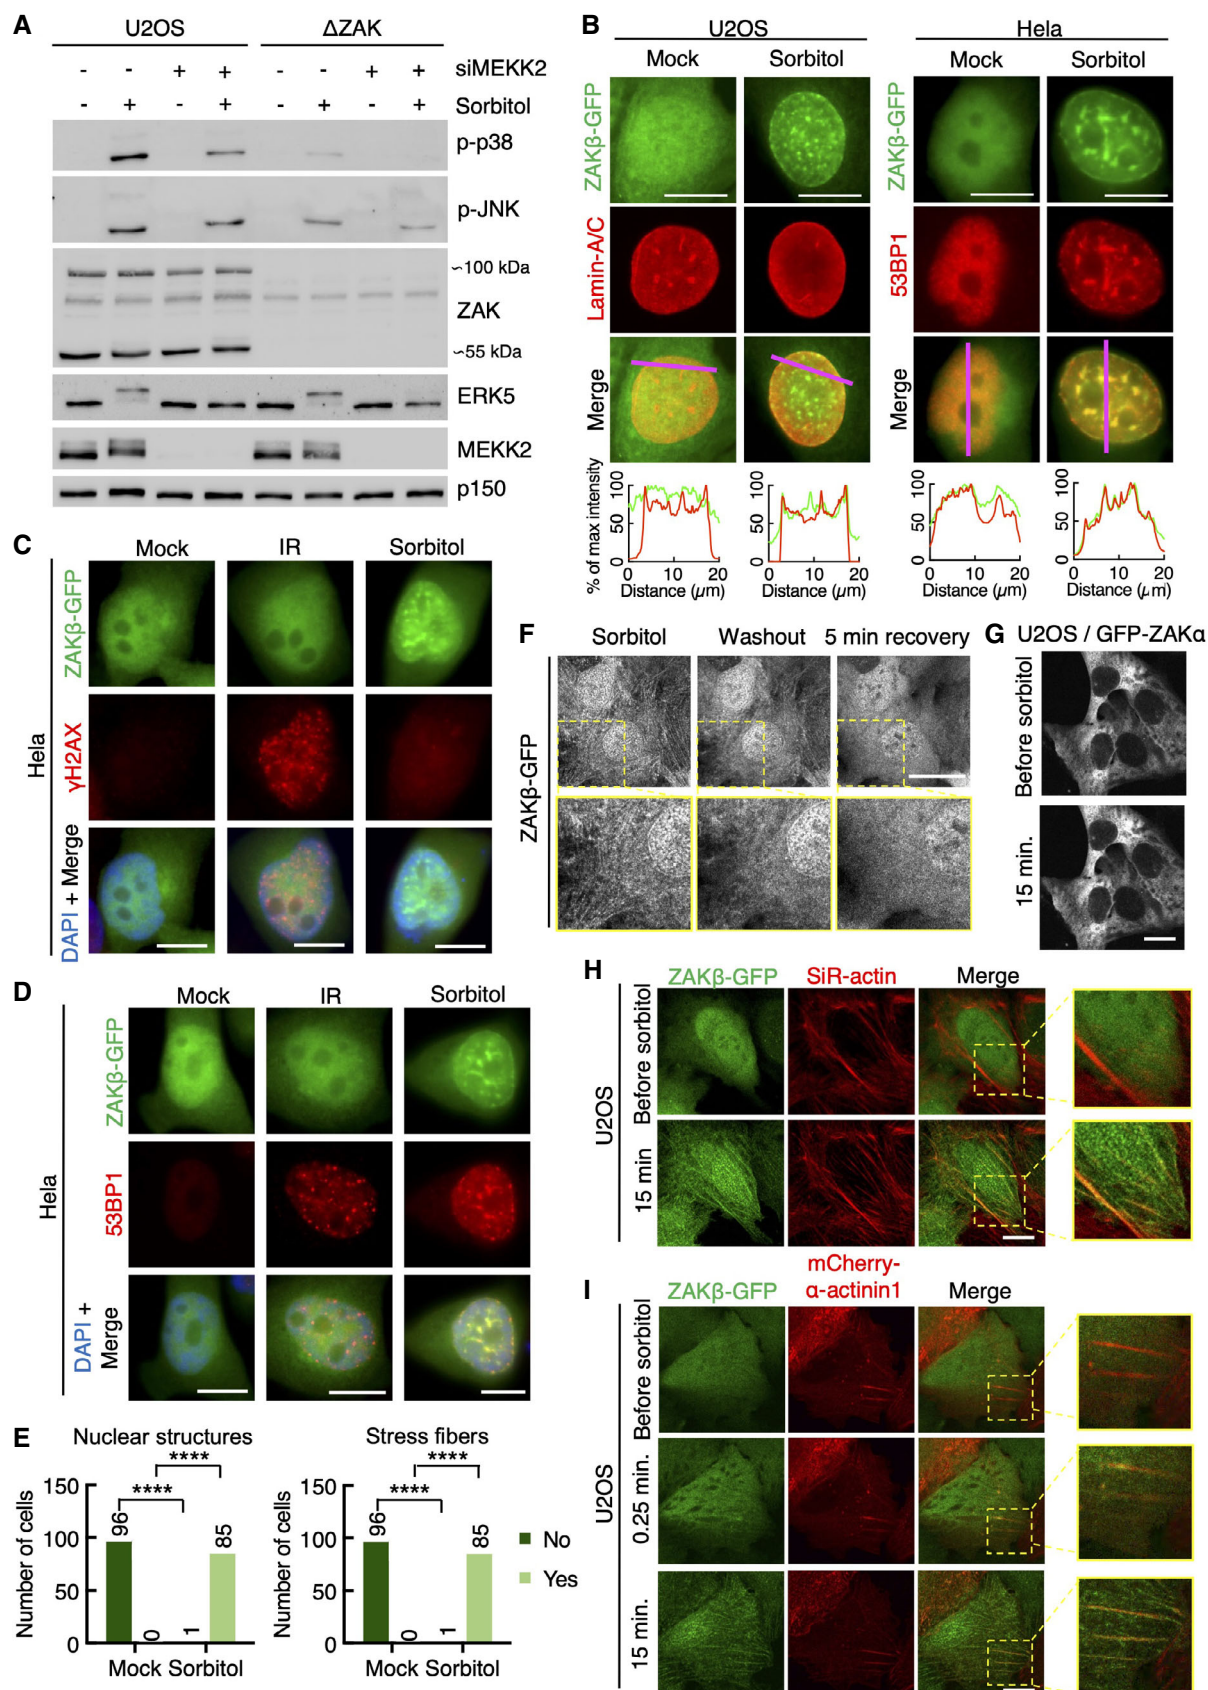

Figure EV2.

**Figure EV3. Cell stretch does not activate ZAK $\beta$ .**

- A Murine C2C12 myoblasts were incubated in myotube differentiation medium with the indicated kinase inhibitors and harvested after 3 and 6 days. Lysates were analyzed by immunoblotting with the indicated antibodies.
- B Images of cells from (A) before harvest. Scale bars, 100  $\mu$ m.
- C C2C12 myotubes (6 d differentiation) pretreated with ZAK inhibitor (ZAKi, 0.5 h) were subjected to equibiaxial cyclic stretch (5 min) as indicated. Lysates were analyzed in (A).
- D Genotype frequencies for pups born from ZAK<sup>+/-</sup> intrabreedings.
- E Litter sizes from WT and ZAK<sup>+/-</sup> intrabreedings. Error bars represent the standard deviations ( $n > 5$  biological replicates). ns—not significant in unpaired t-test.
- F Weight of 16–18-week-old WT and ZAK<sup>+/-</sup> male and female mice. Error bars represent the standard deviations ( $n > 6$  biological replicates). ns, not significant in t-test corrected for multiple comparison using the Bonferroni–Dunn method.
- G Mouse embryonic fibroblasts (MEF) isolated from WT and ZAK<sup>+/-</sup> mice were treated with anisomycin (1 h) or cycloheximide (1 h) as indicated. Lysates were analyzed as in (A).
- H Male mice from (F) were subjected to a retroorbital injection of [3H]-2-deoxyglucose followed by 10 min *in situ* contraction of the lower hindlimb. Upon euthanization, TA muscles were isolated, lysed, and analyzed for glucose uptake/clearance and glycogen content. ns, not significant in 2-way ANOVA ( $n = 3$  biological replicates).
- I Anesthetized 16- to 18-week-old WT and ZAK<sup>+/-</sup> male mice were subjected to 10 min *in situ* contraction of the lower hindlimb. Extensor digitorum longus (EDL) muscles were isolated, lysed, and analyzed by immunoblotting with the indicated antibodies ( $n = 3$  mice).
- J Quantification of western blot results in Fig 4E. Error bars represent the standard deviations. ns—not significant, and \*\*\* $P < 0.001$  in 2-way ANOVA with multiple comparison using the Tukey's method. FC, fold change ( $n = 3$  biological replicates).
- K Quantification of (I). Error bars represent the standard deviations. ns—not significant, and \*\*\*\* $P < 0.0001$  in 2-way ANOVA with multiple comparison using the Tukey's method. FC—fold change ( $n = 3$  biological replicates).

Source data are available online for this figure.

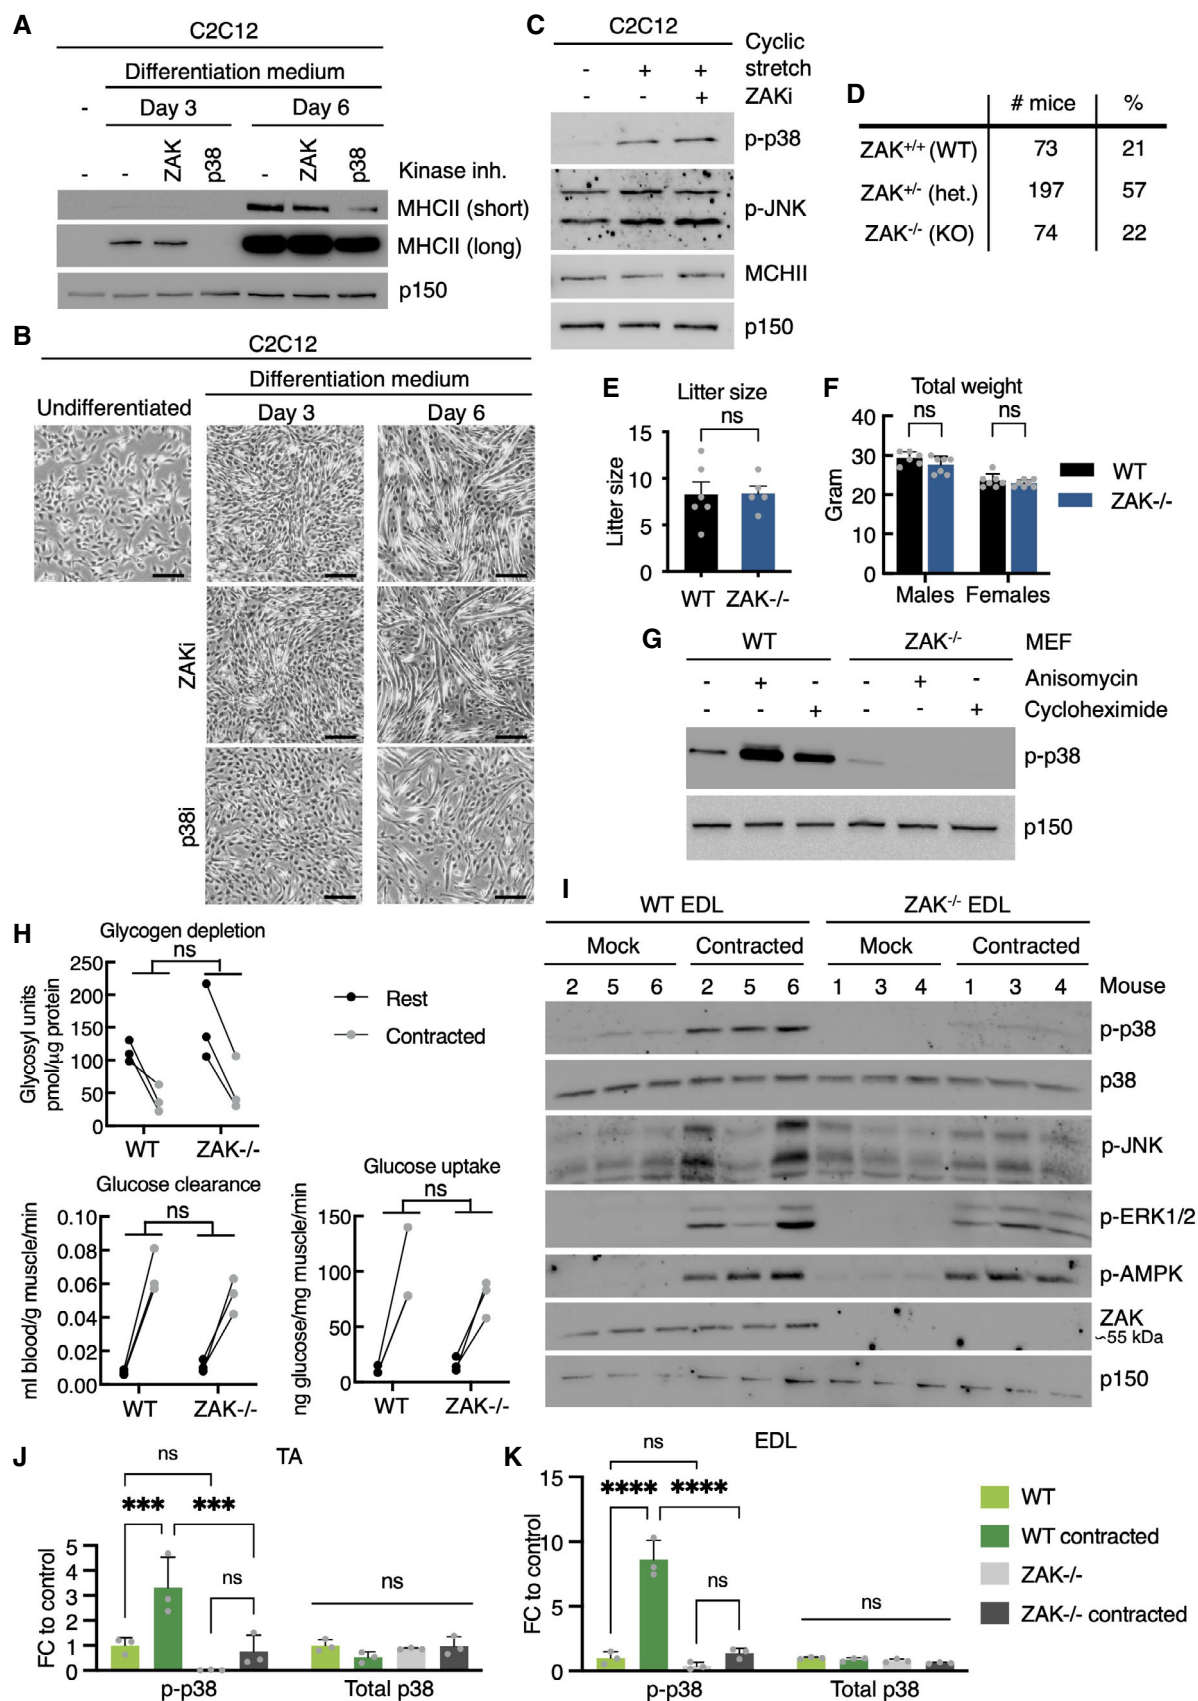

Figure EV3.

**Figure EV4. ZAK $\beta$  mediates muscle contraction-induced MAP kinase activation.**

- A 16-18-week-old WT and ZAK $^{-/-}$  female mice ( $n = 3$ ) were subjected to 10 min *in situ* contractions of the lower hindlimb. Tibialis anterior muscles were isolated and phospho- and total proteomes were recorded by mass spectrometry. Phospho-proteomes were subjected to principal component analysis.
- B As in (A), except that total proteomes were analyzed.
- C Heatmap and clustering of significant phosphorylation changes from data in (A) analyzed by ANOVA. Numbers refer to the mouse-ID. L—left; R—right. Bottom: GO-term enrichment analysis for the cluster with phosphorylation sites showing ZAK-dependent upregulation before and after contraction.
- D TA muscles of 12-week-old WT male mice were electroporated with the indicated GFP constructs. After 7 days the muscle was harvested, sectioned longitudinally, and immunostained with an antibody against the Z-disc marker  $\alpha$ -actinin1. Lower panel: Intensity distribution graphs showing fluorescence intensities along the magenta lines (10  $\mu$ m).
- E Tibialis anterior (TA), gastrocnemius (GAS), and soleus (SOL) muscles were isolated from 16-18-week-old WT and ZAK $^{-/-}$  male and female mice. Values represent the weight of the muscle from one of the legs and error bars represent the standard deviations ( $n > 6$  biological replicates). ns—not significant in *t*-test corrected for multiple comparison using the Bonferroni–Dunn method.
- F H&E staining of soleus muscle cross-sections from 8- and 22-week-old WT and ZAK $^{-/-}$  female mice. Arrows indicate the presence of centralized nuclei.
- G As in (F) except that TA muscles from 8-week-old female mice were analyzed.
- H Quantification of (G). Values indicate the percentage of fibers displaying centralized nuclei and error bars represent the standard deviation ( $n = 6$  biological replicates). ns, not significant in unpaired *t*-test.

Data information: All black scale bars, 50  $\mu$ m.

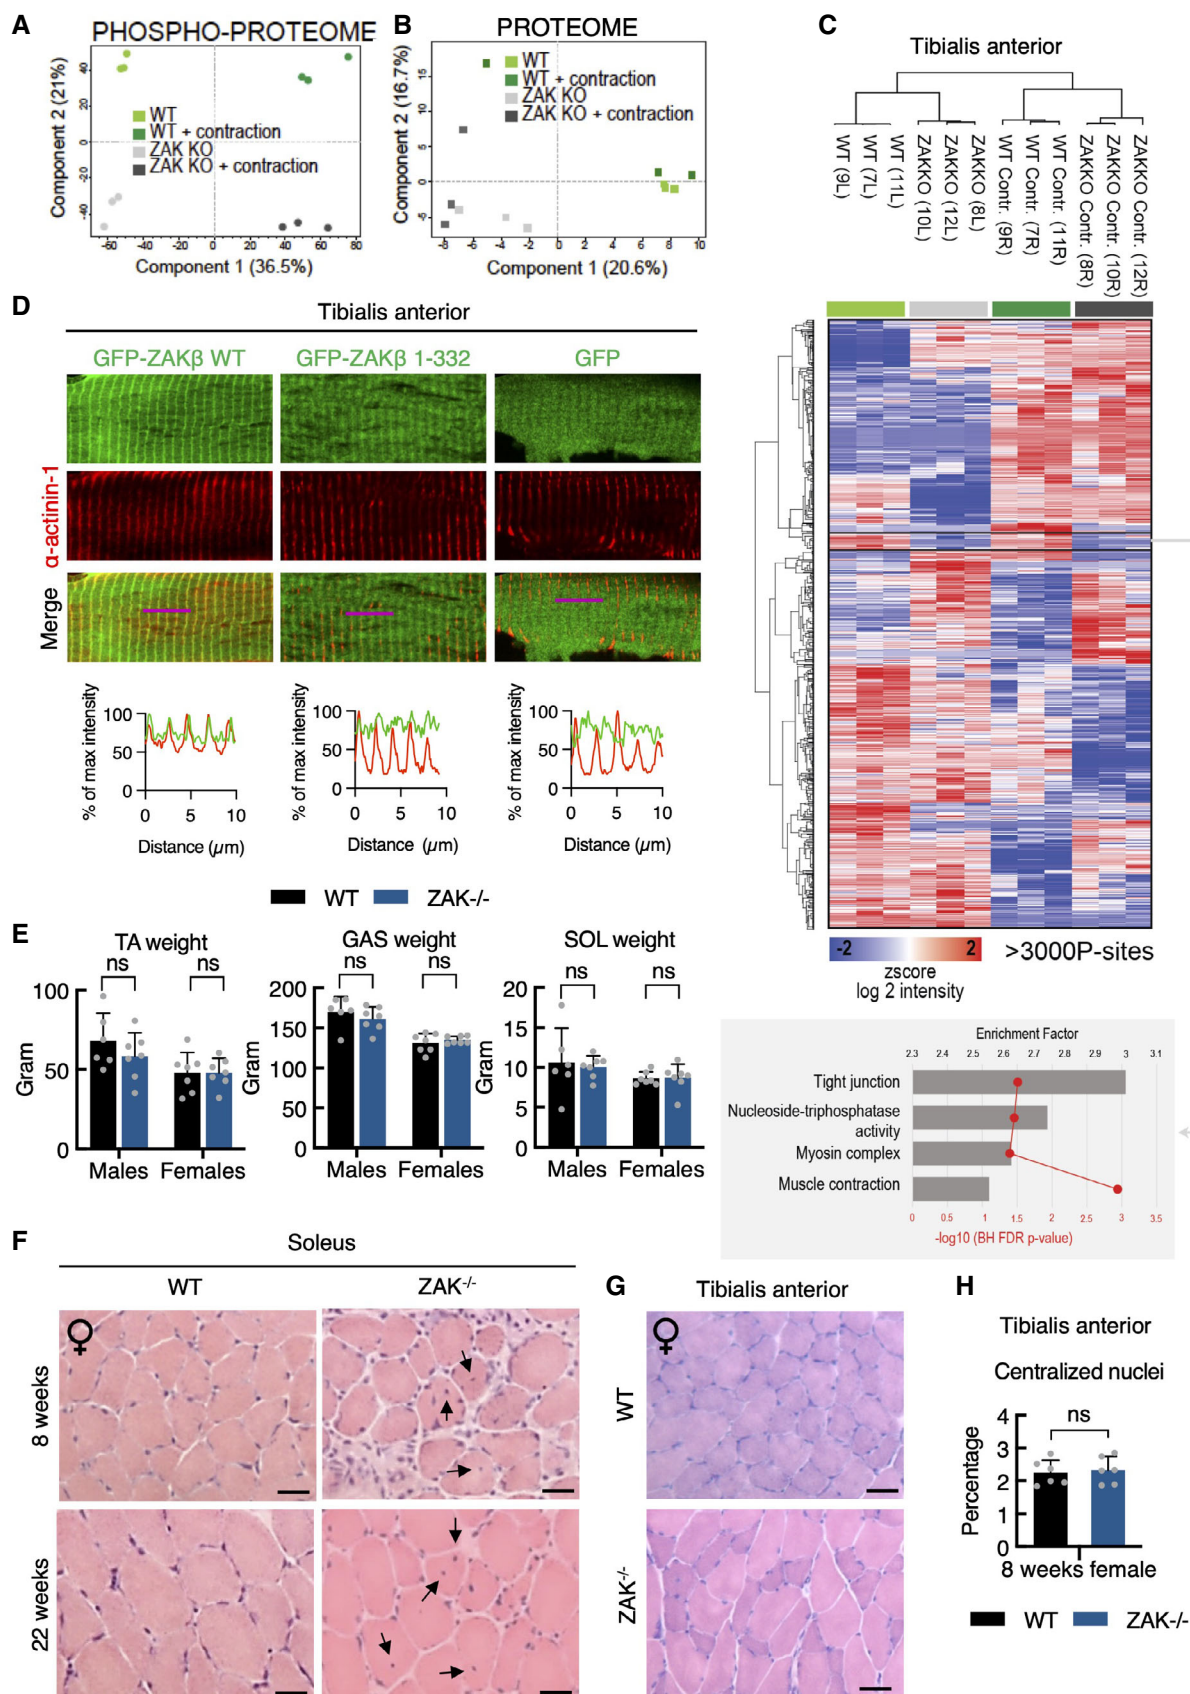

Figure EV4.

**Figure EV5.  $ZAK^{-/-}$  mice present with muscle pathology.**

- A Soleus muscle cross-sections from 8- and 22-week-old WT and  $ZAK^{-/-}$  female mice were immunostained for type I (red) and type IIa (green) fibers using myosin isoform-specific antibodies. Scale bars, 500  $\mu$ m.
- B Correlation map of transcriptomes from all individual samples color-coded according to the correlation coefficient.
- C Number of differentially expressed genes (DEG) for the indicated group comparisons.
- D Volcano plot of up- and downregulated DEGs in soleus muscle dependent on genotype.
- E Volcano plot of up- and downregulated DEGs in TA.
- F General locomotor activity of 16-18-week-old WT and  $ZAK^{-/-}$  male mice was evaluated using a standard open field test. No difference in distance traveled, velocity, time spent moving, or number of entries to the center zone was observed between the genotypes. Error bars represent the standard deviations ( $n = 5$  biological replicates). ns—not significant in unpaired  $t$ -test.
- G Heat maps illustrating representative moving patterns. TA—tibialis anterior; Sol—soleus.

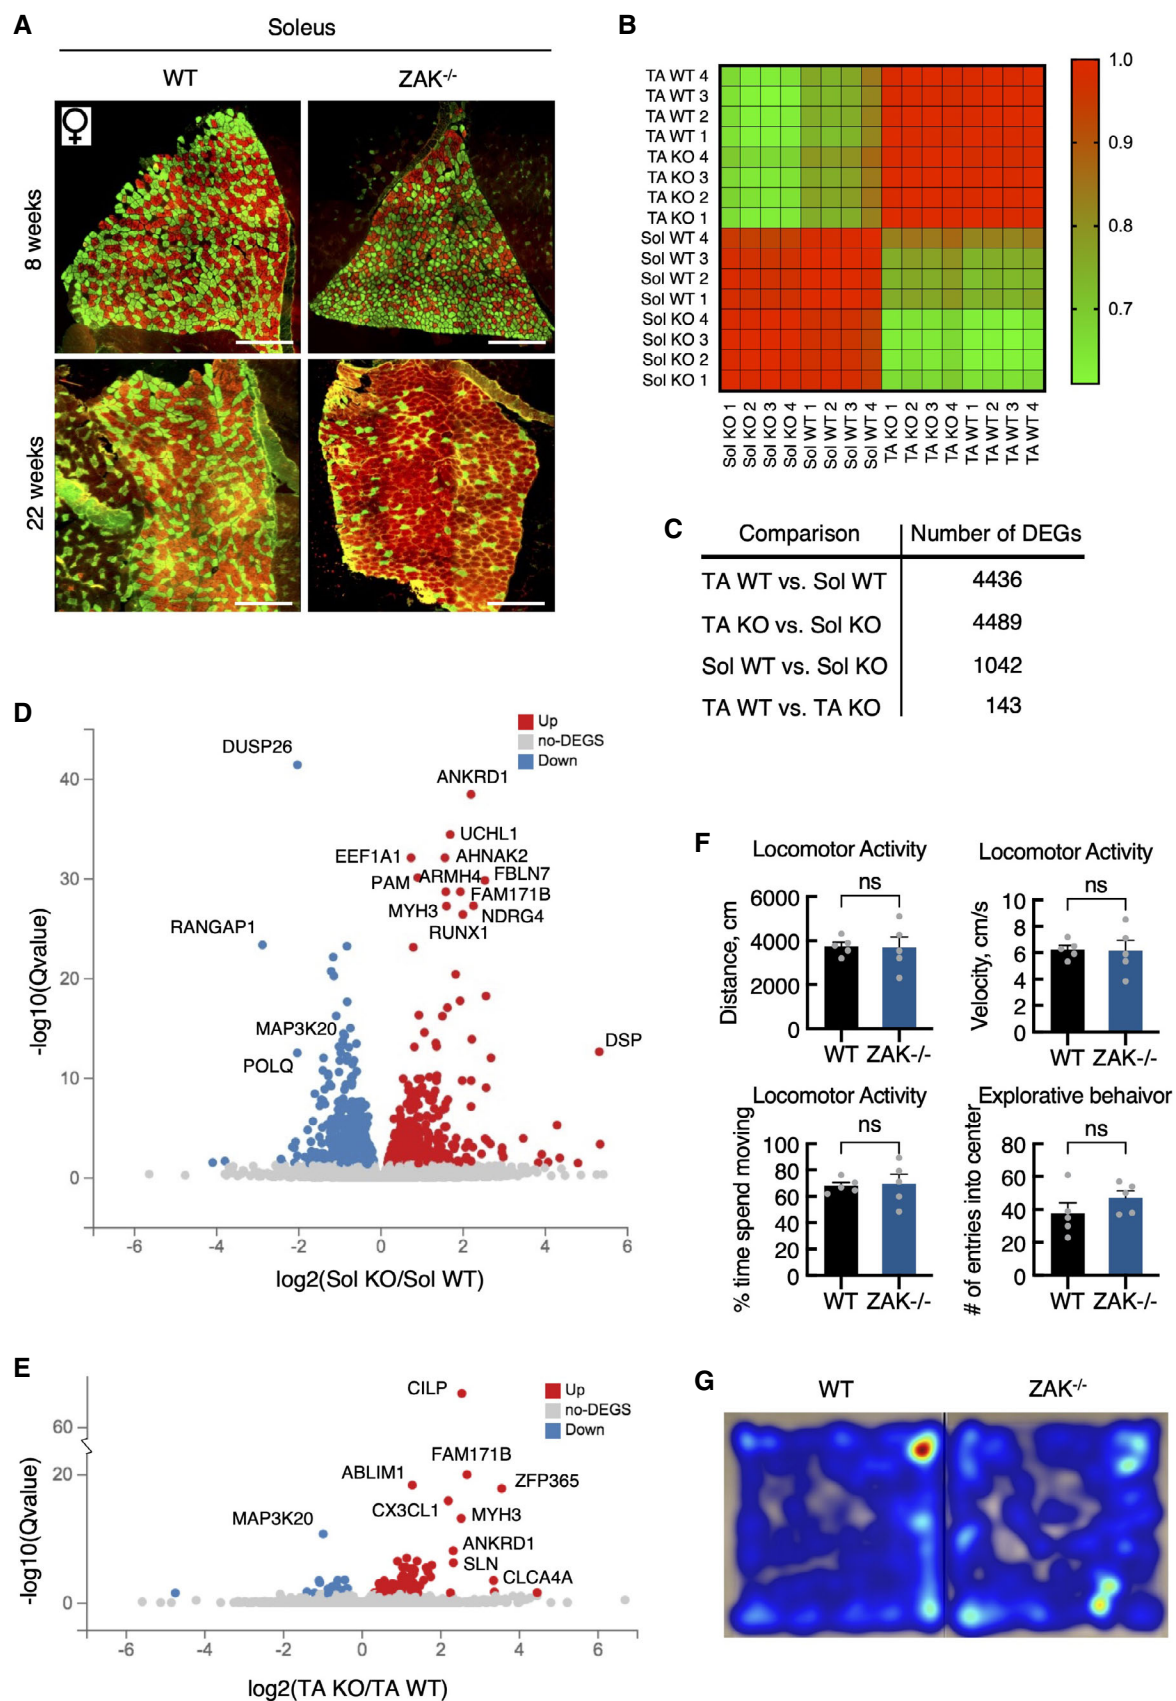

Figure EV5.
